# Supplementary material for: Understanding the Effect of Particle Size and Processing on Almond Lipid Bioaccessibility through Microstructural Analysis: From Mastication to Faecal Collection
Source: Nutrients. 2018 Feb 14;10(2):213. doi: 10.3390/nu10020213 (PMC5852789; doi:10.3390/nu10020213)
Supplement: Supplementary file 1 [file nutrients-10-00213-s001.xlsx]

## Sheet: Sieving
Almond butter
Sieves	1				2
	Weight before chewing	Weight after chewing	Amount recovered	%	Weight before chewing	Weight after chewing	Amount recovered	%	Av. %	Av. Weight	Particle size
Base 1	274.72	279.46			274.52	288.1
Base 2	256	267.73	16.47	85.0723	256.07	256.12	13.63	87.484	86.2781	15.05	0.01
32mm	412.18	412.97	0.79	4.08058	293.54	294.07	0.53	3.4018	3.74119	0.66	32
63mm	293.63	294.01	0.38	1.96281	401.83	402.42	0.59	3.78691	2.87486	0.485	63
125mm	289.28	289.92	0.64	3.30579	429.93	430.43	0.5	3.20924	3.25751	0.57	125
250mm	306.03	306.55	0.52	2.68595	310.2	310.51	0.31	1.98973	2.33784	0.415	250
500mm	328.06	328.16	0.1	0.516529	337.86	337.87	0.01	0.0641849	0.290357	0.055	500
850mm	365.55	365.63	0.08	0.413223	375.08	375.09	0.01	0.0641849	0.238704	0.045	850
1000mm	386.89	387.07	0.18	0.929752	378.88	378.88	0	0	0.464876	0.09	1000
2000mm	425.2	425.29	0.09	0.464876	426.99	426.99	0	0	0.232438	0.045	2000
3350mm	493.15	493.26	0.11	0.568182	496.45	496.45	0	0	0.284091	0.055	3350
			19.36	100			15.58	100	100	17.47
Chopped almonds
Sieves	1				2
	Weight before chewing	Weight after chewing	Amount recovered	%	Weight before chewing	Weight after chewing	Amount recovered	%	Av. %	Av. Weight	Particle size
Base 1	270.94	277	6.06	31.8947	270.79	275.14	4.35	28.1918	30.0433	5.205	0.01
32mm	412.22	416.22	4	21.0526	293.66	293.84	0.18	1.16656	11.1096	2.09	32
63mm	293.66	293.94	0.28	1.47368	401.97	402.12	0.15	0.972132	1.22291	0.215	63
125mm	289.31	289.64	0.33	1.73684	430.07	430.22	0.15	0.972132	1.35449	0.24	125
250mm	306.07	306.77	0.7	3.68421	310.25	310.59	0.34	2.2035	2.94386	0.52	250
500mm	328.08	328.92	0.84	4.42105	337.87	338.49	0.62	4.01815	4.2196	0.73	500
850mm	365.61	365.94	0.33	1.73684	375.08	375.39	0.31	2.00907	1.87296	0.32	850
1000mm	386.9	389.72	2.82	14.8421	378.88	383.76	4.88	31.6267	23.2344	3.85	1000
2000mm	425.29	428.01	2.72	14.3158	427.02	430.5	3.48	22.5535	18.4346	3.1	2000
3350mm	493.27	494.19	0.92	4.84211	496.48	497.45	0.97	6.28645	5.56428	0.945	3350
			19	100			15.43	100	100	17.215
Whole almonds
Sieves	1				2
	Weight before chewing	Weight after chewing	Amount recovered	%	Weight before chewing	Weight after chewing	Amount recovered	%	Av. %	Av. Weight	Particle size
Base 1	274.61	280.9	6.29	39.4357	256.14	261.41	5.27	35.2037	37.3197	5.78	0.01
32mm	412.24	413	0.76	4.76489	412.32	412.55	0.23	1.53641	3.15065	0.495	32
63mm	293.66	293.83	0.17	1.06583	293.72	293.81	0.09	0.601202	0.833517	0.13	63
125mm	289.33	289.55	0.22	1.37931	289.39	289.54	0.15	1.002	1.19066	0.185	125
250mm	306.08	306.78	0.7	4.38871	306.12	306.51	0.39	2.60521	3.49696	0.545	250
500mm	328.1	329.16	1.06	6.64577	328.22	329.02	0.8	5.34402	5.99489	0.93	500
850mm	365.6	366.11	0.51	3.19749	365.7	366.03	0.33	2.20441	2.70095	0.42	850
1000mm	386.91	389.94	3.03	18.9969	387.07	390.03	2.96	19.7729	19.3849	2.995	1000
2000mm	425.29	427.94	2.65	16.6144	425.37	429.03	3.66	24.4489	20.5317	3.155	2000
3350mm	493.29	493.85	0.56	3.51097	493.32	494.41	1.09	7.28123	5.3961	0.825	3350
			15.95	100			14.97	100	100	15.46
Whole roasted almonds
Sieves	1				2
	Weight before chewing	Weight after chewing	Amount recovered	%	Weight before chewing	Weight after chewing	Amount recovered	%	Av. %	Av. Weight	Particle size
Base 1	256.05	260.6	4.55	29.661	270.94	275.68	4.74	29.5511	29.6061	4.645	0.01
32mm	293.34	293.68	0.34	2.21643	412.28	412.99	0.71	4.42643	3.32143	0.525	32
63mm	401.79	402.07	0.28	1.82529	293.7	293.92	0.22	1.37157	1.59843	0.25	63
125mm	429.91	430.22	0.31	2.02086	289.34	289.72	0.38	2.36908	2.19497	0.345	125
250mm	310.14	310.64	0.5	3.25945	306.09	306.96	0.87	5.42394	4.3417	0.685	250
500mm	337.78	338.85	1.07	6.97523	328.15	329.33	1.18	7.35661	7.16592	1.125	500
850mm	375.03	375.71	0.68	4.43286	365.65	366.3	0.65	4.05237	4.24261	0.665	850
1000mm	378.8	383.45	4.65	30.3129	387.05	390.48	3.43	21.384	25.8485	4.04	1000
2000mm	426.94	429.16	2.22	14.472	425.36	428.58	3.22	20.0748	17.2734	2.72	2000
3350mm	496.42	497.16	0.74	4.82399	493.29	493.93	0.64	3.99002	4.40701	0.69	3350
			15.34	100			16.04	100	100	15.69

## Sheet: Butter Prediction
Online Supplemental Material
Supplemental Material - Application of Model
Please contact Dr Terri Grassby (t.grassby@surrey.ac.uk) for details on how to use this spreadsheet.
In summary:
Step 1: Measure average diameter of the cell and input into cell B20. Calculate using d`=4d/PI, where d` is the average apparent diameter from microscopy.
Step 2: Calculate effective threshold value, pt, for specific d value using the equation with lipids released = 1.
Step 3: Measure the particle size distribution of chewed bolus by sieving as per the paper.
Step 4: Insert mass of recovered almond in cell B22.
Step 5: Insert data from 32 to 3350 µm sieves in cells A24 through B32.
Step 6: Predicted value is given in cell G33.
Step 7: If you wish to include the particles retained on the 63 µm sieve that were larger than the threshold p value, the predicted value is given in cell G37.
Source data file		MG sieving data			Input
Sample ID		Almond butter			Calculated
Sample type		Almond butter			Interim result
Equation to be used:					Final result
d = average diameter of cell (µm)	36	Effective threshold value, pt, (mm)		54
p = average cubic particle size of size fraction
Mass of recovered almond (g)	17.47
Sphere diameter, D (µm)	Mass at diameter (g)	Mass at diameter (%)	Equivalent cubic particle size, p (mm)	d/p	Lipid released, LR	*mass%
32	0.66	3.7779	25.7919	1.39579	2.42794	9.17254
63	0.485	2.77619	50.7777	0.708972	1.03447	2.8719
125	0.57	3.26274	100.749	0.357322	0.743373	2.42543
250	0.415	2.3755	201.499	0.178661	0.463533	1.10112
500	0.055	0.314825	402.998	0.0893305	0.259207	0.0816051
850	0.045	0.257584	685.097	0.0525473	0.159632	0.0411187
1000	0.09	0.515169	805.996	0.0446652	0.137024	0.0705904
2000	0.045	0.257584	1611.99	0.0223326	0.0704369	0.0181434
3350	0.055	0.314825	2700.09	0.0133329	0.0425229	0.0133873
			Total % lipid released, LT (Sieving) =			3.7514
Paticles between p = 50 and p=100:		2.59717	54	0.666667	1.0043	2.60835
						6.35975

## Sheet: Chopped Prediction
Online Supplemental Material
Supplemental Material - Application of Model
Please contact Dr Terri Grassby (t.grassby@surrey.ac.uk) for details on how to use this spreadsheet.
In summary:
Step 1: Measure average diameter of the cell and input into cell B20. Calculate using d`=4d/PI, where d` is the average apparent diameter from microscopy.
Step 2: Calculate effective threshold value, pt, for specific d value using the equation with lipids released = 1.
Step 3: Measure the particle size distribution of chewed bolus by sieving as per the paper.
Step 4: Insert mass of recovered almond in cell B22.
Step 5: Insert data from 32 to 3350 µm sieves in cells A24 through B32.
Step 6: Predicted value is given in cell G33.
Step 7: If you wish to include the particles retained on the 63 µm sieve that were larger than the threshold p value, the predicted value is given in cell G37.
Source data file		MG sieving data			Input
Sample ID		Almond butter			Calculated
Sample type		Almond butter			Interim result
Equation to be used:					Final result
d = average diameter of cell (µm)	36	Effective threshold value, pt, (mm)		54
p = average cubic particle size of size fraction
Mass of recovered almond (g)	17.215
Sphere diameter, D (µm)	Mass at diameter (g)	Mass at diameter (%)	Equivalent cubic particle size, p (mm)	d/p	Lipid released, LR	*mass%
32	2.09	12.1406	25.7919	1.39579	2.42794	29.4766
63	0.215	1.24891	50.7777	0.708972	1.03447	1.29197
125	0.24	1.39413	100.749	0.357322	0.743373	1.03636
250	0.52	3.02062	201.499	0.178661	0.463533	1.40016
500	0.73	4.24049	402.998	0.0893305	0.259207	1.09917
850	0.32	1.85884	685.097	0.0525473	0.159632	0.296731
1000	3.85	22.3642	805.996	0.0446652	0.137024	3.06443
2000	3.1	18.0076	1611.99	0.0223326	0.0704369	1.2684
3350	0.945	5.4894	2700.09	0.0133329	0.0425229	0.233425
			Total % lipid released, LT (Sieving) =			8.39867
Paticles between p = 50 and p=100:		1.16838	54	0.666667	1.0043	1.17341
						9.57207

## Sheet: Whole Raw Prediction
Online Supplemental Material
Supplemental Material - Application of Model
Please contact Dr Terri Grassby (t.grassby@surrey.ac.uk) for details on how to use this spreadsheet.
In summary:
Step 1: Measure average diameter of the cell and input into cell B20. Calculate using d`=4d/PI, where d` is the average apparent diameter from microscopy.
Step 2: Calculate effective threshold value, pt, for specific d value using the equation with lipids released = 1.
Step 3: Measure the particle size distribution of chewed bolus by sieving as per the paper.
Step 4: Insert mass of recovered almond in cell B22.
Step 5: Insert data from 32 to 3350 µm sieves in cells A24 through B32.
Step 6: Predicted value is given in cell G33.
Step 7: If you wish to include the particles retained on the 63 µm sieve that were larger than the threshold p value, the predicted value is given in cell G37.
Source data file		MG sieving data			Input
Sample ID		Almond butter			Calculated
Sample type		Almond butter			Interim result
Equation to be used:					Final result
d = average diameter of cell (µm)	36	Effective threshold value, pt, (mm)		54
p = average cubic particle size of size fraction
Mass of recovered almond (g)	15.46
Sphere diameter, D (µm)	Mass at diameter (g)	Mass at diameter (%)	Equivalent cubic particle size, p (mm)	d/p	Lipid released, LR	*mass%
32	0.495	3.20181	25.7919	1.39579	2.42794	7.77382
63	0.13	0.84088	50.7777	0.708972	1.03447	0.869869
125	0.185	1.19664	100.749	0.357322	0.743373	0.889547
250	0.545	3.52523	201.499	0.178661	0.463533	1.63406
500	0.93	6.01552	402.998	0.0893305	0.259207	1.55927
850	0.42	2.71669	685.097	0.0525473	0.159632	0.433671
1000	2.995	19.3726	805.996	0.0446652	0.137024	2.6545
2000	3.155	20.4075	1611.99	0.0223326	0.0704369	1.43744
3350	0.825	5.33635	2700.09	0.0133329	0.0425229	0.226917
			Total % lipid released, LT (Sieving) =			8.83541
Paticles between p = 50 and p=100:		0.786659	54	0.666667	1.0043	0.790043
						9.62545

## Sheet: Whole Roasted Prediction
Online Supplemental Material
Supplemental Material - Application of Model
Please contact Dr Terri Grassby (t.grassby@surrey.ac.uk) for details on how to use this spreadsheet.
In summary:
Step 1: Measure average diameter of the cell and input into cell B20. Calculate using d`=4d/PI, where d` is the average apparent diameter from microscopy.
Step 2: Calculate effective threshold value, pt, for specific d value using the equation with lipids released = 1.
Step 3: Measure the particle size distribution of chewed bolus by sieving as per the paper.
Step 4: Insert mass of recovered almond in cell B22.
Step 5: Insert data from 32 to 3350 µm sieves in cells A24 through B32.
Step 6: Predicted value is given in cell G33.
Step 7: If you wish to include the particles retained on the 63 µm sieve that were larger than the threshold p value, the predicted value is given in cell G37.
Source data file		MG sieving data			Input
Sample ID		Almond butter			Calculated
Sample type		Almond butter			Interim result
Equation to be used:					Final result
d = average diameter of cell (µm)	36	Effective threshold value, pt, (mm)		54
p = average cubic particle size of size fraction
Mass of recovered almond (g)	15.69
Sphere diameter, D (µm)	Mass at diameter (g)	Mass at diameter (%)	Equivalent cubic particle size, p (mm)	d/p	Lipid released, LR	*mass%
32	0.525	3.34608	25.7919	1.39579	2.42794	8.12409
63	0.25	1.59337	50.7777	0.708972	1.03447	1.6483
125	0.345	2.19885	100.749	0.357322	0.743373	1.63457
250	0.685	4.36584	201.499	0.178661	0.463533	2.02371
500	1.125	7.17017	402.998	0.0893305	0.259207	1.85856
850	0.665	4.23837	685.097	0.0525473	0.159632	0.676579
1000	4.04	25.7489	805.996	0.0446652	0.137024	3.52821
2000	2.72	17.3359	1611.99	0.0223326	0.0704369	1.22109
3350	0.69	4.39771	2700.09	0.0133329	0.0425229	0.187003
			Total % lipid released, LT (Sieving) =			11.1297
Paticles between p = 50 and p=100:		1.49063	54	0.666667	1.0043	1.49704
						12.6268
